# Supplementary material for: One-Step Ultrasonic Preparation of Stable Bovine Serum Albumin-Perovskite for Fluorescence Analysis of L-Ascorbic Acid and Alkaline Phosphatase
Source: MDPI journal article supplement (doi:10.3390/bios13080770), 2023-07-28
Supplement: s1 [file s1]

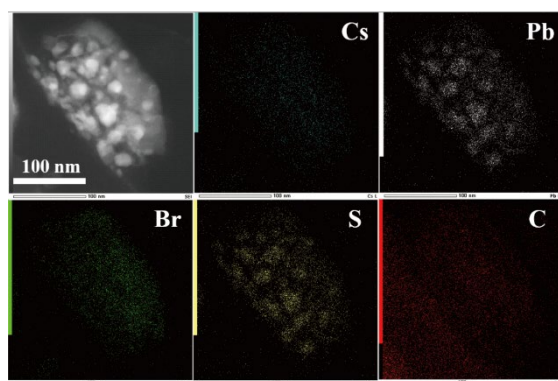

**Figure S1.** EDS digital (TEM) of CsPbBr<sub>3</sub>/BSA NCs.

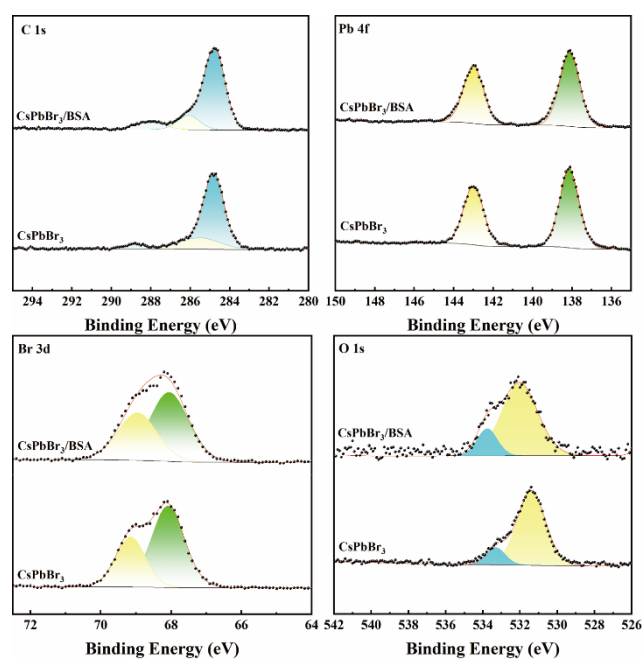

**Figure S2.** High-resolution XPS scans of CsPbBr<sub>3</sub> and CsPbBr<sub>3</sub>/BSA NCs.

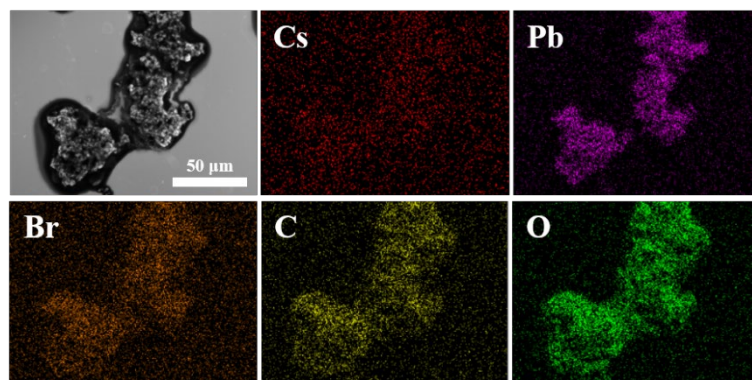

**Figure S3.** EDS of the precipitate resulting from the reaction of CsPbBr<sub>3</sub>/BSA NCs and AA.

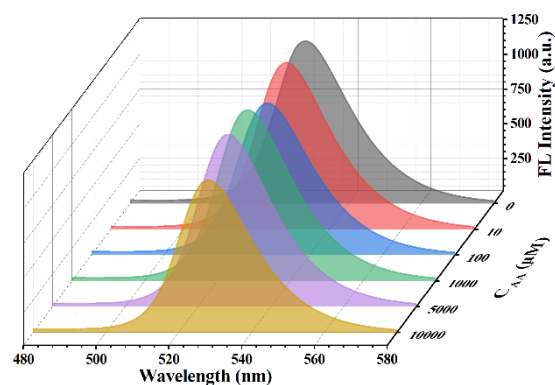

**Figure S4.** The fluorescence intensity of CsPbBr<sub>3</sub> NCs (without BSA) with different concentration of AA.

**Table S1.** Comparison with several reported ALP biosensors.

| Method            | Linear range (U/L) | LOD (U/L) | Reference |
|-------------------|--------------------|-----------|-----------|
| Fluorescence      | 1 - 30             | 0.92      | [1]       |
| Chemiluminescence | 0 - 400            | 0.07      | [2]       |
| SERS              | 0.72 - 3           | 0.01      | [3]       |
| DPV               | 0.1 - 5            | 0.03      | [4]       |
| EIS               | 100 - 1000         | 9.1       | [5]       |
| Fluorescence      | 40 - 500           | 15.5      | This work |

## References

1. Liu, S.G.; Han, L.; Li, N.; Fan, Y.Z.; Yang, Y.Z.; Li, N.B.; Luo, H.Q. A ratiometric fluorescent strategy for alkaline phosphatase activity assay based on g-C<sub>3</sub>N<sub>4</sub>/CoOOH nanohybrid via target-triggered competitive redox reaction, *Sens. Actuators B: Chem.* 283 (2019) 515-523. <https://doi.org/https://doi.org/10.1016/j.snb.2018.12.052>.
2. Liu, X.T.; Fan, N.N.; Wu, L.J.; Wu, C.C.; Zhou, Y.Q.; Li, P.; Tang, B. Lighting up alkaline phosphatase in drug-induced liver injury using a new chemiluminescence resonance energy transfer nanoprobe, *Chem. Commun.* 54(88) (2018) 12479-12482. <https://doi.org/10.1039/c8cc07211f>.
3. Zeng, Y.; Ren, J.Q.; Wang, S.K.; Mai, J.M.; Qu, B.; Zhang, Y.; Shen, A.G.; Hu, J.M. Rapid and reliable detection of alkaline phosphatase by a hot spots amplification strategy based on well-controlled assembly on single nanoparticle, *ACS Appl. Mater. Interfaces* 9(35) (2017) 29547-29553. <https://doi.org/10.1021/acsami.7b09336>.
4. Liu, Y.; Xiong, E.; Li, X.; Li, J.; Zhang, X.; Chen, J. Sensitive electrochemical assay of alkaline phosphatase activity based on TdT-mediated hemin/G-quadruplex DNAzyme nanowires for signal amplification, *Biosens. Bioelectron.* 87 (2017) 970-975. <https://doi.org/https://doi.org/10.1016/j.bios.2016.09.069>.
5. Mahato, K.; Purohit, B.; Kumar, A.; Chandra, P. Clinically comparable impedimetric immunosensor for serum alkaline phosphatase detection based on electrochemically engineered Au-nano-Dendroids and graphene oxide nanocomposite, *Biosens. Bioelectron.* 148 (2020) 111815. <https://doi.org/https://doi.org/10.1016/j.bios.2019.111815>.

**Disclaimer/Publisher's Note:** The statements, opinions and data contained in all publications are solely those of the individual author(s) and contributor(s) and not of MDPI and/or the editor(s). MDPI and/or the editor(s) disclaim responsibility for any injury to people or property resulting from any ideas, methods, instructions or products referred to in the content.
